# Supplementary material for: Photoluminescence performance enhancement of ZnO/MgO heterostructured nanowires and their applications in ultraviolet laser diodes
Source: Royal Society of Chemistry journal article supplement (doi:10.1039/c5cp00674k), 2015-01-01
Supplement: c5cp00674k1.pdf [file c5cp00674k1.pdf]

## SUPPORTING INFORMATION

# Photoluminescence performance enhancement of ZnO/MgO heterostructured nanowires and their applications in ultraviolet laser diodes

Zhi-Feng Shi,<sup>a</sup> Yuan-Tao Zhang,<sup>\*a</sup> Xi-Jun Cui,<sup>a</sup> Shi-Wei Zhuang,<sup>a</sup> Bin Wu,<sup>a</sup> Xian-Wei Chu,<sup>a</sup>  
Xin Dong,<sup>a</sup> Bao-Lin Zhang,<sup>\*a</sup> Guo-Tong Du<sup>ab</sup>

<sup>a</sup>*State Key Laboratory on Integrated Optoelectronics, College of Electronic Science and Engineering, Jilin University, Qianjin Street 2699, Changchun 130012, China*

<sup>b</sup>*School of Physics and Optoelectronic Technology, Dalian University of Technology, Dalian 116023, China*

---

<sup>a</sup>) Author to whom correspondence should be addressed. Electronic mail: [zhangyt@jlu.edu.cn](mailto:zhangyt@jlu.edu.cn), [zbl@jlu.edu.cn](mailto:zbl@jlu.edu.cn)

## Angular-dependent EL measurements

Figure S1 presents the lasing spectra observed at different placement angles relative to the detector above the threshold. One can see that the lasing action can be clearly observed in all the four recording configurations, and the positions and intensities of the lasing peaks vary randomly in the EL spectra.

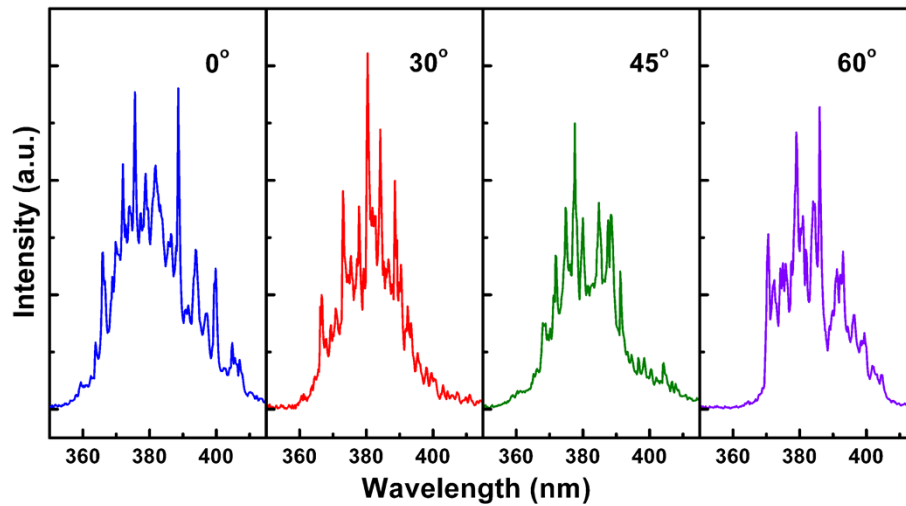

FIG. S1. EL spectra of the laser diode taken from different placement angles relative to the detector operating at 6.4 mA.

## Schematic diagrams showing the band alignment of the Au/MgO/ZnO structure

Figure S2 shows the expected simplified band alignment of the Au/MgO/ZnO structure assuming that there are no imperfections at the interfaces. The electrical parameters, electron affinity and energy band gap, of the involved materials are known from literatures.<sup>1-3</sup>

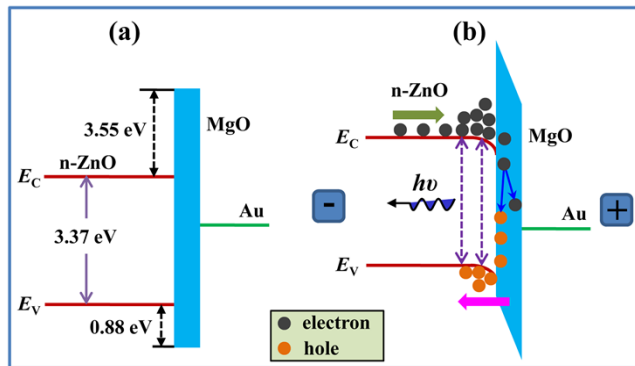

FIG. S2. Energy band diagrams of the heterostructure under (a) thermal equilibrium and (b) positive bias, respectively.

## Wide-range EL spectrum in the UV-visible region

Figure S3 shows the wide-range EL spectra of the laser diode operating at 7.9 mA in the UV-visible region. One can see that the device exhibits a relatively weak visible emission at around 500 nm.

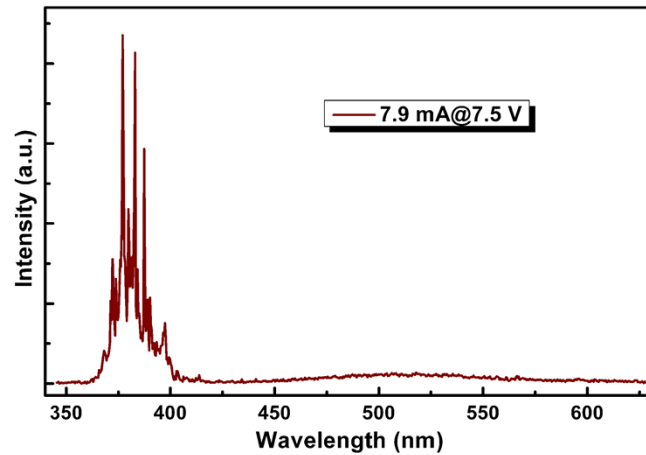

FIG. S3. Room temperature EL spectrum of the device in the UV-visible region.

[1] M. B. Herbert, *J. Appl. Phys.*, 1977, **48**, 4729.

- [2] J. A. Aranovich, D. G. Golmayo, A. L. Fahrenbruch and R. H. Bube, *Appl. Phys. Lett.*, 1980, **51**, 4260.
- [3] H. Zhu, C. X. Shan, B. Yao, B. H. Li, J. Y. Zhang, Z. Z. Zhang, D. X. Zhao, D. Z. Shen, X. W. Fan, Y. M. Lu and Z. K. Tang, *Adv. Mater.*, 2009, **21**, 1613.
